# Supplementary material for: Centrifugal study of zone of influence during air-sparging
Source: Royal Society of Chemistry journal article supplement (doi:10.1039/c0em00594k), 2011-01-01
Supplement: c0em00594k.pdf [file c0em00594k.pdf]

We have included a video of air bubble stream development during centrifuge test and pictures for different sparging pressures as supplementary information.

Supplementary Information 1: BubbleMovement2.5s.avi

It is a video of air bubble entry and bubble stream development under a certain sparging pressure during centrifuge test.

Supplementary Information 2:

Pictures for obtaining ZOI under different sparging pressures

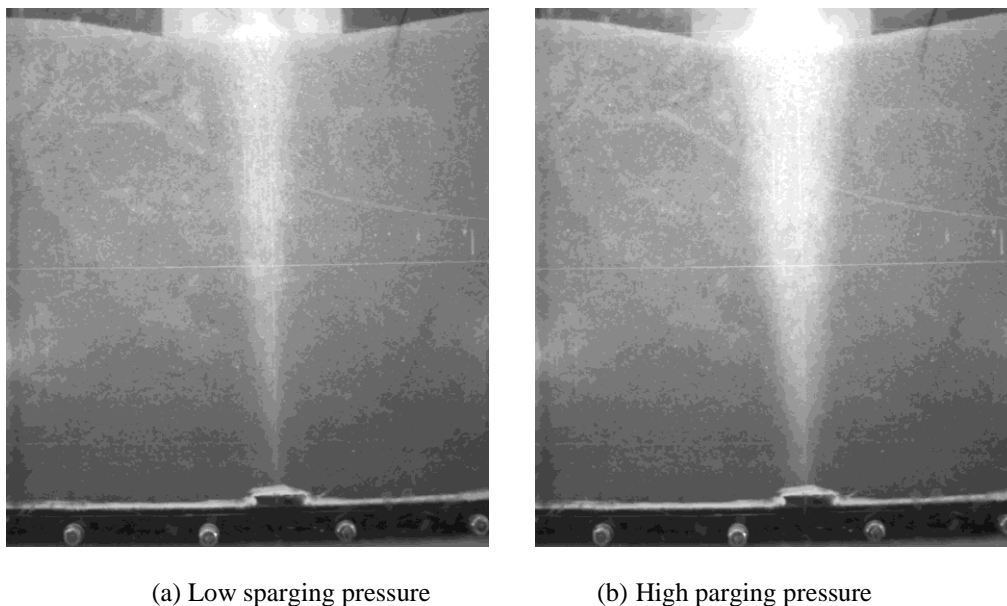

FIGURE 1. Zone of Influence under different sparging pressure in 40-g level centrifuge test
